# Supplementary material for: Thirst interneurons that promote water seeking and limit feeding behavior in Drosophila
Source: eLife. 2021 May 21;10:e66286. doi: 10.7554/eLife.66286 (PMC8139827; doi:10.7554/eLife.66286)
Supplement: Supplementary file 2. [file elife-66286-supp2.xlsx]

## Sheet: Supplementary file 2
Supplementary file 2. Strains and Resources
Designation	Detailed information	Source	Locator
Genetic background	w- Berlin	Ulrike Heberlein	n/a
Durstig-Gal4	PBac{IT.GAL4}CG4502(1234-G4)	PMID: 21473015	n/a
R52A01-Gal4	w[1118]; P{y[+t7.7] w[+mC]=GMR52A01-GAL4}attP2	PMID: 18621688	BDSC: 47634
R52A01-AD	w[1118]; P{y[+t7.7] w[+mC]=R52A01-p65.AD}attP40	Janelia	BDSC: 70721
R52A01-LexA	w[1118]; P{y[+t7.7] w[+mC]=GMR52A01-lexA}attP40/CyO	Janelia	BDSC: 61553
R65D05-Gal4	w[1118]; P{y[+t7.7] w[+mC]=GMR65D05-GAL4}attP2	PMID: 18621688	BDSC: 39351
R65D05-DBD	w[1118]; P{y[+t7.7] w[+mC]=R65D05-GAL4.DBD}attP2	Janelia	BDSC: 69667
R65D05-LexA	w[1118]; P{y[+t7.7] w[+mC]=GMR65D05-lexA}attP40	Janelia	BDSC: 53625
R34G02-Gal4	w[1118]; P{y[+t7.7] w[+mC]=GMR34G02-GAL4}attP2	PMID: 18621688	BDSC: 49797
Ir40a-Gal4	w[*]; P{w[+mC]=Ir40a-GAL4.3011}214.1; TM2/TM6B, Tb[1]	PMID: 21940430	BDSC: 41727
Ir68a-Gal4	w[1118]; P{y[+t7.7] w[+mC]=VT029048-GAL4}attP2	VDRC	No longer available
ppk28-Gal4	w;; ppk28-Gal4	Kristin Scott	Flybase: FBtp0054514
TH-Gal4	P{ple-GAL4.F}	PMID: 12555273	BDSC: 8848
0104-Gal4	w[1118]; PBac{w[+mC]=IT.GAL4}LpR1[0104-G4]	PMID: 21473015	BDSC: 62639
R58E02-Gal4	w[1118]; P{y[+t7.7] w[+mC]=GMR58E02-GAL4}attP2	PMID: 18621688	BDSC: 41347
R48B04-Gal4	w[1118]; P{y[+t7.7] w[+mC]=GMR48B04-GAL4}attP2	PMID: 18621688	BDSC: 50347
R48B04-Gal80	R48B04-Gal80 (attP40)	PMID: 25728694
NPF-Gal4	w; NPF-Gal4 (attP40)	Julie Simpson
NP883-Gal4	w[*]; P{GawB}NP0883	PMID: 12324948	Kyoto: 103803
98-Gal4	w[1118]; PBac{w[+mC]=IT.GAL4}0098-G4	PMID: 21473015	BDSC: 77516
R19H09-Gal4	w[1118]; P{y[+t7.7] w[+mC]=GMR19H09-GAL4}attP2	PMID: 18621688	BDSC: 52209
R50H05-Gal4	w[1118]; P{y[+t7.7] w[+mC]=GMR50H05-GAL4}attP2	PMID: 18621688	BDSC: 38764
Akh-Gal4	y[1] w[*]; P{w[+mC]=Akh-gal4.L}3	PMID: 15166157	BDSC: 25684
Ilp2-Gal4	w[*]; P{w[+mC]=Ilp2-GAL4.R}2	Eric Rulifson	BDSC: 37516
Ilp3-Gal4	w[1118]; P{w[+mC]=Ilp3-GAL4.C}2/CyO	Marc Bourouis	BDSC: 52660
Cha-Gal80	P{ChAT.7.4kb-Gal80}	Hubert Amrein
VGlut-Gal80	w[*]; P{y[+t7.7] w[+mC]=VGlut-GAL80.V}attP40	Leslie Vosshall	BDSC: 58448
GAD-Gal80	P{Gad1-GAL80}	PMID: 19531155
MB-Gal80	w[*]; P{mb247-GAL80.T}	PMID: 17196534	BDSC: 64306
R51G05-Gal4	w[1118]; P{y[+t7.7] w[+mC]=GMR51G05-GAL4}attP2	PMID: 18621688	BDSC: 38797
R51H05-Gal4	w[1118]; P{y[+t7.7] w[+mC]=GMR51H05-GAL4}attP2	PMID: 18621688	BDSC: 41275
R51B08-Gal4	w[1118]; P{y[+t7.7] w[+mC]=GMR51B08-GAL4}attP2	PMID: 18621688	BDSC: 48183
R51C07-Gal4	w[1118]; P{y[+t7.7] w[+mC]=GMR51C07-GAL4}attP2	PMID: 18621688	BDSC: 38773
R51C09-Gal4	w[1118]; P{y[+t7.7] w[+mC]=GMR51C09-GAL4}attP2	PMID: 18621688	BDSC: 48185
otd-nlsFLPo	w; Otd-nls::FLPo (attP40)	David Anderson	PMID: 24439378
AstA(sk1)	w;; AstA(sk1)	Shu Kondo	PMID: 26123697
Df(AstA)	w[1118]; Df(3R)BSC519/TM6C, Sb[1] cu[1]		BDSC: 25023
NPF(sk2)	w;; NPF(sk2)	Shu Kondo	Flybase ID: FBal0343403
Df(NPF)	w[1118]; Df(3R)BSC472/TM6C, Sb[1] cu[1]		BDSC: 24976
UAS-TrpA1	w[*]; P{y[+t7.7] w[+mC]=UAS-TrpA1(B).K}attP2	Paul Garrity	BDSC: 26264
UAS-Shi	w[*]; PBac{y[+mDint2] w[+mC]=20XUAS-TTS-shi[ts1]-p10}VK00005	PMID: 18621688	BDSC: 66600
UAS-TeTx	w[*]; P{w[+mC]=UAS-TeTxLC.tnt}	PMID: 7857643	BDSC: 28837
LexAOP-Gal80	w[*]; P{y[+t7.7] w[+mC]=8XLexAop2-IVS-GAL80-WPRE}attP2		BDSC: 32213
UAS-STOP-TrpA1	UAS>stop>dTRPA1mCherry	David Anderson	PMID: 24439378
UAS-STOP-Shi	w[*]; P{w[+mC]=UAS(FRT.stop)shi[ts]}2		BDSC: 66675
UAS-myrGFP	w[*]; P{y[+t7.7] w[+mC]=10XUAS-IVS-myr::GFP}attP2		BDSC: 32197
UAS-Chrimson	w[1118]; P{y[+t7.7] w[+mC]=20XUAS-IVS-CsChrimson.mVenus}attP2		BDSC: 55136
UAS-sytGFP, UAS-DenMark	w[1118]; P{w[+mC]=UAS-DenMark}2, P{w[+mC]=UAS-syt.eGFP}2; In(3L)D, mirr[SaiD1] D[1]/TM6C, Sb[1]		BDSC: 33064
UAS-MCFO	w[1118] P{y[+t7.7] w[+mC]=hs-FLPG5.PEST}attP3; PBac{y[+mDint2] w[+mC]=10xUAS(FRT.stop)myr::smGdP-HA}VK00005 P{y[+t7.7] w[+mC]=10xUAS(FRT.stop)myr::smGdP-V5-THS-10xUAS(FRT.stop)myr::smGdP-FLAG}su(Hw)attP1	PMID: 25964354	BDSC: 64085
UAS-TRIC	w[*] P{y[+t7.7] w[+mC]=10XUAS-IVS-mCD8::RFP}attP18 P{y[+t7.7] w[+mC]=13XLexAop2-mCD8::GFP}su(Hw)attP8; P{y[+t7.7] w[+mC]=nSyb-MKII::nlsLexADBDo}attP24/CyO; M{w[+mC]=UAS-p65AD::CaM}ZH-86Fb	PMID: 25961791	BDSC: 61679
UAS-VGAT.IR KK	P{KK101500}VIE-260B		VDRC: v103586
UAS-VGAT.IR GD	w[1118]; P{GD1990}v45916		VDRC: v45916
UAS-Gad1.IR	y[1] v[1]; P{y[+t7.7] v[+t1.8]=TRiP.JF02916}attP2		BDSC: 28079
UAS-AstA.IR KK	P{KK111259}VIE-260B		VDRC: v103215
UAS-AstA.IR GD	w[1118]; P{GD6203}v14397		VDRC: v14397
UAS-AstA.IR sh	w; UAS-AstA shRNAi	Hiromu Tanimoto	PMID: 27997541
UAS-AstA-R1.IR	w; UAS-AstA-R1 RNAi	Hiromu Tanimoto	PMID: 27997541
UAS-AstA-R2.IR	w; UAS-AstA-R2 RNAi	Hiromu Tanimoto	PMID: 27997541
UAS-NPF.IR sh	w; P{VSH330277}attP40		VDRC: 330277
UAS-Dcr2	w[1118]; P{w[+mC]=UAS-Dcr-2.D}2		BDSC: 24650
All-trans retinal		Sigma-Aldrich	R2500
Rabbit anti-AstA	anti-A-Allatostatin	Jena Bioscience	ABD-062
Rabbit anti-NPF	Anti-NPF antibody	RayBiotech	RB-19-0001-20
Rabbit anti-VGAT	Anti-VGAT antibody	David Krantz	PMID: 20435823
Rabbit anti-GFP	Anti-GFP antibody	Life Technologies	A6455
Mouse anti-GFP	Anti-GFP antibody	Sigma	G6539
Chicken anti-GFP	Anti-GFP antibody	Abcam	ab13970
Rabbit anti-dsRed	Living Colors® DsRed Polyclonal Antibody	Takara	632496
Rat anti-FLAG	DYKDDDDK Epitope Tag Antibody (L5)	Novus Biologicals	NBP-06712SS
Mouse anti-DLG	4F3 anti-discs large	Developmental Studies Hybridoma Bank	4F3
Mouse anti-Brp	NC82 Bruchpilot	Developmental Studies Hybridoma Bank	NC82
