# Supplementary material for: Thirst interneurons that promote water seeking and limit feeding behavior in Drosophila
Source: eLife. 2021 May 21;10:e66286. doi: 10.7554/eLife.66286 (PMC8139827; doi:10.7554/eLife.66286)
Supplement: Supplementary file 3. [file elife-66286-supp3.xlsx]

## Sheet: Supplementary file 3
Supplementary file 3. Experimental conditions and statistical analyses
Figure	#	Genotype / treatment	Conditions	n	Brown-Forsythe normality	Post-hoc	Result	Adjusted P
Figure 1D	1	2h Thirsty	open water	8	0.7358	Dunnett’s
	2	4h Thirsty	7-10 min	8			ns	0.0645 (1 vs. 2)
	3	8h Thirsty		8			*	0.0129 (1 vs. 3)
	4	12h Thirsty		13			****	<0.0001 (1 vs. 4)
	5	16h Thirsty		8			****	<0.0001 (1 vs. 5)
	6	20h Thirsty		8			****	<0.0001 (1 vs. 6)
	7	24h Thirsty		8			****	<0.0001 (1 vs. 7)
Figure 1E	1	0h Thirsty	Locomotor speed	8	0.5656	Dunnett’s
	2	2h Thirsty	13-19 min	4			ns	0.8586 (1 vs. 2)
	3	4h Thirsty		8			ns	0.5923 (1 vs. 3)
	4	6h Thirsty		10			**	0.0048 (1 vs. 4)
	5	8h Thirsty		8			**	0.0086 (1 vs. 5)
	6	12h Thirsty		8			****	<0.0001 (1 vs. 6)
	7	16h Thirsty		8			****	<0.0001 (1 vs. 7)
Figure 1F	1	12h Thirsty	dry sucrose vs. open water	6	Shapiro-Wilk (0.2828)	One sample t test	**	0.0018
	2	16h Hungry	7-10 min	8	Shapiro-Wilk (0.3375)		*	0.0358
Figure 1G	1	Open Water / No Surgery	16h thirsty	8	0.3987	Dunnett’s
	2	Grid	7-10 min	9			ns	0.9081 (1 vs. 2)
	3	Antennectomy		8			****	<0.0001 (1 vs. 3)
	4	Grid and Antennectomy		9			****	<0.0001 (1 vs. 4)
	5	Grid and Aristae ablation		11			ns	0.5864 (1 vs. 5)
Figure 1H	1	Replete, Open Water	intake	8	Kruskal-Wallis	Dunn’s
	2	12h Thirsty, Open Water		8			****	<0.0001 (1 vs. 2)
	3	12h Thirsty, Grid		18			****	<0.0001(1 vs. 3)
	4	12h Thirsty, Open Water, Antennectomty		8			****	<0.0001 (1 vs. 4)
Figure 1J	1	w; Durstig-Gal4; UAS-TrpA1	replete	19	Kruskal-Wallis	Dunn’’s
	2	w; Durstig-Gal4; +	wet sucrose	11			***	0.0002 (1 vs. 2)
	3	w; +; UAS-TrpA1	13-16 min	8			**	0.0020 (1 vs. 3)
	4	w; Durstig-Gal4; UAS-TrpA1	replete	5	0.0935	Tukey’s
	5	w; Durstig-Gal4; +	open water	6			****	<0.0001 (4 vs. 5)
	6	w; +; UAS-TrpA1	13-16 min	7			****	<0.0001 (4 vs. 6)
	7	w; Durstig-Gal4; UAS-TrpA1	replete	15	0.055	Tukey’s
	8	w; Durstig-Gal4; +	dry sucrose	8			****	<0.0001 (7 vs. 8)
	9	w; +; UAS-TrpA1	13-16 min	8			***	0.0003 (7 vs. 9)
Figure 1K	1	w; Durstig-Gal4; UAS-TrpA1	antennectomy	8	0.819	Tukey’s
	2	w; Durstig-Gal4; +	open water	9			****	<0.0001 (1 vs. 2)
	3	w; +; UAS-TrpA1	13-16 min	11			****	<0.0001 (1 vs. 3)
	4	w; Durstig-Gal4; UAS-TrpA1	grid	12	Kruskal-Wallis	Dunn’s
	5	w; Durstig-Gal4; +	open water	8			***	0.0005 (4 vs. 5)
	6	w; +; UAS-TrpA1	13-16 min	8			***	0.0007 (4 vs. 6)
	7	w; Durstig-Gal4; UAS-TrpA1	antennectomy, grid	3	0.5945	Tukey’s
	8	w; Durstig-Gal4; +	open water	4			ns	0.9993 (7 vs. 8)
	9	w; +; UAS-TrpA1	13-16 min	8			ns	0.9373 (7 vs. 9)
Figure 1-figure supplement 1A	1	w; TH-Gal4; UAS-TrpA1	replete	14	0.2042	Tukey’s
	2	w; TH-Gal4; +	open water	8			ns	0.0930 (1 vs. 2)
	3	w; +; UAS-TrpA1	13-16 min	10			ns	0.0619 (1 vs. 3)
	4	w; +; 0104-Gal4/UAS-TrpA1	replete	14	0.4865	Tukey’s
	5	w; +; 0104-Gal4	open water	12			ns	0.7045 (4 vs. 5)
	6	w; +; UAS-TrpA1	13-16 min	6			ns	0.4573 (4 vs. 6)
	7	w; +; R58E02-Gal4/UAS-TrpA1	replete	8	0.1423	Tukey’s
	8	w; +; R58E02-Gal4	open water	6			***	0.0003 (7 vs. 8)
	9	w; +; UAS-TrpA1	13-16 min	8			**	0.0089 (7 vs. 9)
Figure 1-figure supplement 1B	10	w; +; R48B04-Gal4/UAS-TrpA1	replete	6	0.3697	Dunnett’s	ns	0.2482 (15 vs. 10)
	11	w; +; R48B04-Gal4	open water	7			****	<0.0001 (15 vs. 11)
	12	w; +; UAS-TrpA1	13-16 min	4			****	<0.0001 (15 vs. 12)
	13	w; Durstig-Gal4/R48B04-Gal80; UAS-TrpA1		7			ns	0.0897 (15 vs. 13)
	14	w; R48B04-Gal80; +		8			****	<0.0001 (15 vs. 14)
	15	w; Durstig-Gal4; UAS-TrpA1		8
Figure 1-figure supplement 1C	1	w; NPF-Gal4; UAS-TrpA1	replete	8	Kruskal-Wallis	Dunn’s
	2	w; NPF-Gal4: +	open water	8			ns	>0.9999 (1 vs. 2)
	3	w; +; UAS-TrpA1	13-16 min	8			ns	>0.9999 (1 vs. 3)
	4	w; NP883-Gal4; UAS-TrpA1	replete	8	Kruskal-Wallis	Dunn’s
	5	w; NP883-Gal4: +	open water	8			*	0.0138 (4 vs. 5)
	6	w; +; UAS-TrpA1	13-16 min	8			**	0.0015 (4 vs. 6)
	7	w; +; 98-Gal4/UAS-TrpA1	replete	8	0.5423	Tukey’s
	8	w; +; 98-Gal4	open water	5			ns	0.6837 (7 vs. 8)
	9	w; +; UAS-TrpA1	13-16 min	8			ns	0.6406 (7 vs. 9)
	10	w; +; R65D05-Gal4/UAS-TrpA1	replete	9	0.4933	Tukey’s
	11	w; +; R65D05-Gal4	open water	5			***	0.0005 (10 vs. 11)
	12	w; +; UAS-TrpA1	13-16 min	8			****	<0.0001 (10 vs. 12)
	13	w; +; R19H09-Gal4/UAS-TrpA1	replete	7	0.2621
	14	w; +; R19H09-Gal4	open water	7		Tukey’s	ns	0.2225 (13 vs. 14)
	15	w; +; UAS-TrpA1	13-16 min	8			ns	0.1555 (13 vs. 15)
	16	w; +; R50H05-Gal4/UAS-TrpA1	replete	11	0.3328
	17	w; +; R50H05-Gal4	open water	7		Tukey’s	ns	0.4680 (16 vs. 17)
	18	w; +; UAS-TrpA1	13-16 min	8			ns	0.9217 (16 vs. 18)
	19	w; AKH-Gal4; UAS-TrpA1	replete	12	0.9097	Tukey’s
	20	w; AKH-Gal4: +	open water	9			ns	0.4990 (19 vs. 20)
	21	w; +; UAS-TrpA1	13-16 min	8			ns	0.9113 (19 vs. 21)
	22	w; dilp2-Gal4; UAS-TrpA1	replete	7	Kruskal-Wallis	Dunn’s
	23	w; dilp2-Gal4: +	open water	6			ns	0.0764 (22 vs. 23)
	24	w; +; UAS-TrpA1	13-16 min	8			ns	0.2637 (22 vs. 24)
	25	w; dilp3-Gal4; UAS-TrpA1	replete	11	0.7172	Tukey’s
	26	w; dilp3-Gal4: +	open water	9			ns	0.7754 (25 vs. 26)
	27	w; +; UAS-TrpA1	13-16 min	8			ns	0.6727 (25 vs. 27)
Figure 1-figure supplement 1D	1	w; +; R34G02-Gal4/UAS-TrpA1	replete	9	0.8944	Tukey’s
	2	w; +; R34G02-Gal4	open water	5			ns	0.9559 (1 vs. 2)
	3	w; +; UAS-TrpA1	13-16 min	6			ns	0.0715 (2 vs. 3)
	4	w; Ir40a-Gal4; UAS-TrpA1	replete	8	Kruskal-Wallis	Dunn’s
	5	w; Ir40a-Gal4; +	open water	8			**	0.0045 (4 vs. 5)
	6	w; +; UAS-TrpA1	13-16 min	8			*	0.0353 (4 vs. 6)
	7	w; Ir68a-Gal4; UAS-TrpA1	replete	8	0.6009	Tukey’s
	8	w; Ir68a-Gal4; +	open water	8			ns	0.9939 (7 vs. 8)
	9	w; +; UAS-TrpA1	13-16 min	8			**	0.0014 (7 vs. 9)
	10	w; +; ppk28-Gal4/UAS-TrpA1	replete	9	0.859	Tukey’s
	11	w; +; ppk28-Gal4	open water	8			ns	0.6803 (10 vs. 11)
	12	w; +; UAS-TrpA1	13-16 min	5			ns	0.5760 (10 vs. 12)
Figure 2A	6	w; Durstig-Gal4; UAS-TrpA1	replete	8	0.0573	Dunnett’s
	7	w; Durstig-Gal4/R65D05-LexA; UAS-TrpA1/LexAop-Gal80	grid	13			**	0.0033 (6 vs. 7)
	8	w; Durstig-Gal4/R65D05-LexA; UAS-TrpA1	13-16 min	12			ns	0.9907 (6 vs. 8)
	9	w; Durstig-Gal4; UAS-TrpA1/LexAop-Gal80		9			ns	>0.9999 (6 vs. 9)
	10	w; Durstig-Gal4/R65D05-LexA; LexAop-Gal80		13			****	<0.0001 (6 vs. 10)
	11	w; R65D05-LexA; UAS-TrpA1/LexAop-Gal80		9			****	<0.0001 (6 vs. 11)
Figure 2B	1	w, UAS-STOP-TrpA1mcherry; otd-nls::FLPo; R65D05-Gal4	replete	15	Kruskal-Wallis	Dunn’s
	2	w, UAS-STOP-TrpA1mcherry; +; R65D05-Gal4	grid	5			**	0.0028 (1 vs 2)
	3	w; otd-nls::FLPo; R65D05-Gal4	13-16 min	8			*	0.0467 (1 vs. 3)
	4	w, UAS-STOP-TrpA1mcherry; otd-nls::FLPo; +		8			*	0.0238 (1 vs. 4)
Figure 2C	1	w; otd-nls::FLPo; R65D05-Gal4/UAS-STOP-Shibirets	8h thirsty	8	0.3487	Tukey’s
	2	w; R65D05-Gal4/UAS-STOP-Shibirets	grid	8			****	<0.0001 (1 vs. 2)
	3	w; otd-nls::FLPo; R65D05-Gal4	13-16 min	8			****	<0.0001 (1 vs. 3)
	4	w; otd-nls::FLPo; UAS-STOP-Shibirets		8			****	<0.0001 (1 vs. 4)
Figure 2D	1	w; Durstig-Gal4; UAS-TrpA1	replete	19	0.5423	Dunnett’s
	2	w; Durstig-Gal4/R52A01-LexA; UAS-TrpA1/LexAop-Gal80	grid	12			****	<0.0001 (1 vs. 2)
	3	w; Durstig-Gal4; LexAop-Gal80	13-16 min	10			****	<0.0001 (1 vs. 3)
	4	w; Durstig-Gal4/R52A01-LexA; +		5			****	<0.0001 (1 vs. 4)
	5	w; Durstig-Gal4/R52A01-LexA; LexAop-Gal80		5			****	<0.0001 (1 vs. 5)
Figure 2E	1	w; +; R52A01-Gal4/UAS-TrpA1	replete	16	0.6844	Tukey’s
	2	w; +; R52A01-Gal4	grid	8			****	<0.0001 (1 vs. 2)
	3	w; +; UAS-TrpA1	13-16 min	8			****	<0.0001 (1 vs. 3)
Figure 2F	1	w; +; R52A01-Gal4/UAS-Shibirets	8h thirsty	8	0.3138	Tukey’s
	2	w; +; R52A01-Gal4	grid	8			**	0.0012 (1 vs. 2)
	3	w; +; UAS-Shibirets	16-20 min	8			***	0.0001 (1 vs. 3)
Figure 2J	1	w; R65D05-DBD; R52A01-AD/UAS-TrpA1	replete	8	0.7516	Tukey’s
	2	w;; R52A01-AD/UAS-TrpA1	grid	8			*	0.0278 (1 vs. 2)
	3	w; R65D05-DBD; UAS-TrpA1	13-16 min, 32°C	8			ns	0.4355 (1 vs. 4)
	4	w; R65D05-DBD; R52A01-AD/UAS-TrpA1	replete	8	0.2417	Tukey's
	5	w;; R52A01-AD/UAS-TrpA1	open	10			****	<0.0001 (4 vs. 5)
	6	w; R65D05-DBD; UAS-TrpA1	7-10 min, 32°C	3			****	<0.0001 (4 vs. 6)
Figure 2K	1	w; R65D05-DBD; R52A01-AD/UAS-Shibirets	8h thirsty	8	Kruskal-Wallis	Dunn’s
	2	w;; R52A01-AD/UAS-Shibirets	grid	8			*	0.0158 (1 vs. 2)
	3	w; R65D05-DBD; UAS-Shibirets	7-10 min	8			*	0.0176 (1 vs. 3)
	4	w; R65D05-DBD; R52A01-AD/UAS-Shibirets	8h thirsty	12	Kruskal-Wallis	Dunn's
	5	w;; R52A01-AD/UAS-Shibirets	open	8			ns	0.9581 (4 vs. 5)
	6	w; R65D05-DBD; UAS-Shibirets	7-10 min	7			ns	0.7834 (4 vs. 6)
Figure 2-figure supplement 1B	1	w, UAS-STOP-TrpA1mcherry;otd-nls::FLPo; R65D05-Gal4	replete	8	0.0566	Tukey’s
	2	w, UAS-STOP-TrpA1mcherry;; R65D05-Gal4	open	8			****	<0.0001 (1 vs. 2)
	3	w; otd-nls::FLPo; R65D05-Gal4	13-16 min	8			****	<0.0001 (1 vs. 3)
	4	w, UAS-STOP-TrpA1mcherry; otd-nls::FLPo	31°C	8			****	<0.0001 (1 vs. 4)
	5	w, UAS-STOP-TrpA1mcherry; otd-nls::FLPo; R65D05-Gal4	replete	8	0.4008	Tukey's
	6	w, UAS-STOP-TrpA1mcherry;; R65D05-Gal4	open	8			ns	0.9903 (5 vs. 6)
	7	w; otd-nls::FLPo; R65D05-Gal4	13-16 min	8			ns	0.0889 (5 vs. 7)
	8	w, UAS-STOP-TrpA1mcherry; otd-nls::FLPo	23°C	8			ns	0.9305 (5 vs. 8)
Figure 2-figure supplement 1C	1	w; otd-nls::FLPo; R65D05-Gal4/UAS-STOP-Shibirets	8h thirsty	8	0.0993	Tukey’s
	2	w; R65D05-Gal4/UAS-STOP-Shibirets	grid	8			ns	0.9581 (1 vs. 2)
	3	w; otd-nls::FLPo; R65D05-Gal4	13-16 min	8			*	0.0217 (1 vs. 3)
	4	w; otd-nls::FLPo; UAS-STOP-Shibirets	23°C	8			ns	0.1683 (1 vs. 4)
Figure 2-figure supplement 1D	5	w; otd-nls::FLPo; R65D05-Gal4/UAS-STOP-Shibirets	8h thirsty	8	0.1744	Tukey's
	6	w; R65D05-Gal4/UAS-STOP-Shibirets	open water	8			ns	0.1612 (5 vs. 6)
	7	w; otd-nls::FLPo; R65D05-Gal4	4-7 min	8			ns	0.1250 (5 vs. 7)
	8	w; otd-nls::FLPo; UAS-STOP-Shibirets	31°C	8			ns	0.1171 (5 vs. 8)
Figure 2-figure supplement 1E	1	w; UAS-TeTx; R65D05-Gal4	16h thirsty	8	0.1661	Tukey’s
	2	w;; R65D05-Gal4	grid	8			**	0.0022 (1 vs. 2)
	3	w; UAS-TeTx	4-7 min	8			***	0.0004 (1 vs. 3)
Figure 2-figure supplement 1F	1	w; UAS-TeTx; R65D05-Gal4	16h hungry	8	0.3178	Tukey’s
	2	w;; R65D05-Gal4	dry sucrose	8			**	0.0023 (1 vs. 2)
	3	w; UAS-TeTx	7-10 min	8			**	0.0024 (1 vs. 3)
Figure 2-figure supplement 2A	1	w; Durstig-Gal4; UAS-TrpA1	replete	27	Kruskal-Wallis	Dunn’s
	2	w; Durstig-Gal4; UAS-TrpA1/Cha-Gal80	grid	9			***	0.0001 (1 vs. 2)
	3	w; Durstig-Gal4; UAS-TrpA1/VGlut-Gal80	13-16 min	9			***	0.0002 (1 vs. 3)
	4	w; Durstig-Gal4; UAS-TrpA1/GAD-Gal80		9			ns	0.6142 (1 vs. 4)
	5	w; Durstig-Gal4; UAS-TrpA1/MB-Gal80		8			ns	0.0590 (1 vs. 5)
	6	w;; UAS-TrpA1	replete	22	Kruskal-Wallis	Dunn's
	7	w;; UAS-TrpA1/Cha-Gal80	grid	9			ns	0.8151 (6 vs. 7)
	8	w;; UAS-TrpA1/VGlut-Gal80	13-16 min	9			ns	0.3006 (6 vs. 8)
	9	w;; UAS-TrpA1/GAD-Gal80		8			ns	0.0589 (6 vs. 9)
	10	w;; UAS-TrpA1/MB-Gal80		8			*	0.0347 (6 vs. 10)
Figure 2-figure supplement 2B	1	w; Durstig-Gal4; UAS-TrpA1	replete	24	Kruskal-Wallis	Dunn’s
	2	w; Durstig-Gal4; UAS-TrpA1/Cha-Gal80	open water	8			***	0.0004 (1 vs. 2)
	3	w; Durstig-Gal4; UAS-TrpA1/VGlut-Gal80	13-16 min	9			ns	0.5877 (1 vs. 3)
	4	w; Durstig-Gal4; UAS-TrpA1/GAD-Gal80		9			ns	>0.9999 (1 vs. 4)
	5	w; Durstig-Gal4; UAS-TrpA1/MB-Gal80		9			ns	0.7613 (1 vs. 5)
	6	w;; UAS-TrpA1	replete	15	Kruskal-Wallis	Dunn's
	7	w;; UAS-TrpA1/Cha-Gal80	open water	7			ns	>0.9999 (6 vs. 7)
	8	w;; UAS-TrpA1/VGlut-Gal80	13-16 min	9			ns	0.8848 (6 vs. 8)
	9	w;; UAS-TrpA1/GAD-Gal80		8			ns	>0.9999 (6 vs. 9)
	10	w;; UAS-TrpA1/MB-Gal80		9			ns	0.5394 (6 vs. 10)
Figure 2-figure supplement 2D	1	w;; R51H05-Gal4/UAS-TrpA1	replete	8	0.9521	Tukey's
	2	w;; R51H05-Gal4	open	4			**	0.0058 (1 vs. 2)
	3	w;; UAS-TrpA1	13-16 min	4			**	0.0078 (1 vs. 3)
	4	w;; R51C09-Gal4/UAS-TrpA1	replete	10	0.1605	Tukey's
	5	w;; R51C09-Gal4	open	6			ns	0.1964 (4 vs. 5)
	6	w;; UAS-TrpA1	13-16 min	8			***	0.0003 (4 vs. 6)
	7	w;; R52A01-Gal4/UAS-TrpA1	replete	16	0.6844	Tukey's
	8	w;; R52A01-Gal4	open	8			****	<0.0001 (7 vs. 8)
	9	w;; UAS-TrpA1	13-16 min	8			****	<0.0001 (7 vs. 9)
	10	w;; R51C07-Gal4/UAS-TrpA1	replete	8	0.4955	Tukey's
	11	w;; R51C07-Gal4	open	8			ns	0.6025 (10 vs. 11)
	12	w;; UAS-TrpA1	13-16 min	8			ns	0.8996 (10 vs. 12)
	13	w;; R51G05-Gal4/UAS-TrpA1	replete	7	0.5874	Tukey's
	14	w;; R51G05-Gal4	open	4			ns	0.0700 (13 vs. 14)
	15	w;; UAS-TrpA1	13-16 min	3			ns	0.9433 (13 vs. 15)
	16	w;; R51B08-Gal4/UAS-TrpA1	replete	14	0.1211	Tukey's
	17	w;; R51B08-Gal4	open	7			ns	0.7015 (16 vs. 18)
	18	w;; UAS-TrpA1	13-16 min	7			*	0.0150 (16 vs. 18)
Figure 2-figure supplement 2E	1	w; +; R52A01-Gal4/UAS-TrpA1	replete	7	0.4371	Dunnett’s
	2	w; VGlut-Gal80; R52A01-Gal4/UAS-TrpA1	grid	6			**	0.0017 (1 vs. 2)
	3	w; +; R52A01-Gal4	13-16 min	7			****	<0.0001 (1 vs. 3)
	4	w; VGlut-GAL80; UAS-TrpA1		6			****	<0.0001 (1 vs. 4)
Figure 2-figure supplement 2F	1	w; R65D05-Gal4/UAS-TrpA1	replete	11	Kruskal-Wallis	Dunn’s
	2	w; R65D05-Gal4	grid	10			**	0.0030 (1 vs. 2)
	3	w; VGlut-Gal80; UAS-TrpA1	4-7 min, 30°C	10			***	0.0005 (1 vs. 3)
	4	w; VGlut-Gal80; R65D05-Gal4/UAS-TrpA1		11			*	0.0234 (1 vs. 4)
Figure 2-figure supplement 3A	1	w; R65D05-DBD/otd-nls::FLPo; R52A01-AD/UAS-STOP-TrpA1	replete	8	0.1869	Dunnett’s
	2	w; R65D05-DBD/otd-nls::FLPo; UAS-STOP-TrpA1	open	8			ns	0.2009 (1 vs. 2)
	3	w; otd-nls::FLPo; R52A01-AD/UAS-STOP-TrpA1	13-16 min, 30°C	8			*	0.0403 (1 vs. 3)
	4	w; R65D05-DBD; R52A01-AD/UAS-STOP-TrpA1		10			*	0.0298 (1 vs. 4)
	5	w; R65D05-DBD/otd-nls::FLPo; R52A01-AD		11			***	0.0002 (1 vs. 5)
Figure 2-figure supplement 3B	1	w; R65D05-DBD/otd-nls::FLPo; R52A01-AD/UAS-STOP-Shibirets	8h thirsty	8	0.3229	Dunnett’s
	2	w; R65D05-DBD/otd-nls::FLPo; UAS-STOP-Shibirets	grid	9			**	0.0028 (1 vs. 2)
	3	w; otd-nls::FLPo; R52A01-AD/UAS-STOP-Shibirets	7-10 min	9			***	0.0005 (1 vs. 3)
	4	w; R65D05-DBD; R52A01-AD/UAS-STOP-Shibirets		15			****	<0.0001 (1 vs. 4)
	5	w; R65D05-DBD/otd-nls::FLPo; R52A01-AD		8			****	<0.0001 (1 vs. 5)
	6	w; R65D05-DBD/otd-nls::FLPo; R52A01-AD/UAS-STOP-Shibirets	8h thirsty	8	0.2308	Dunnett's
	7	w; R65D05-DBD/otd-nls::FLPo; UAS-STOP-Shibirets	open	8			ns	0.8848 (6 vs. 7)
	8	w; otd-nls::FLPo; UAS-STOP-Shibirets	7-10 min	4			ns	>0.9999 (6 vs. 8)
	9	w; R65D05-DBD; R52A01-AD		4			ns	0.9955 (6 vs. 9)
	10	w; R65D05-DBD/otd-nls::FLPo; R52A01-AD		8			ns	0.8603 (6 vs. 10)
Figure 2-figure supplement 3C	1	w; R65D05-DBD; R52A01-AD/UAS-Shibirets	8h thirsty	8	0.2714	Tukey’s
	2	w;; R52A01-AD/UAS-Shibirets	grid	8			ns	0.6444 (1 vs. 2)
	3	w; R65D05-DBD; UAS-Shibirets	7-10 min, 23°C	8			ns	0.9195 (1 vs. 3)
Figure 2-figure supplement 3D	1	w; R65D05-DBD; R52A01-AD/UAS-TrpA1	fed	8	0.2202	Tukey’s
	2	w;; R52A01-AD/UAS-TrpA1	dry sucrose	8			ns	0.9094 (1 vs. 2)
	3	w; R65D05-DBD; UAS-TrpA1	7-10 min, 30°C	8			ns	0.5397 (1 vs. 3)
	4	w; R65D05-DBD; R52A01-AD/UAS-TrpA1	16h hungry	10	0.7901	Tukey's
	5	w;; R52A01-AD/UAS-TrpA1	dry sucrose	8			ns	0.0833 (4 vs. 5)
	6	w; R65D05-DBD; UAS-TrpA1	7-10 min, 30°C	6			ns	0.2888 (4 vs. 6)
Figure 2-figure supplement 3E	1	w; R65D05-DBD/otd-nls::FLPo; R52A01-AD/UAS-STOP-Shibirets	fed	8	0.7962	Dunnett’s
	2	w; R65D05-DBD/otd-nls::FLPo; UAS-STOP-Shibirets	dry sucrose	8			ns	0.6936 (1 vs. 2)
	3	w; otd-nls::FLPo; R52A01-AD/UAS-STOP-Shibirets	16-20 min, 32°C	8			ns	0.8090 (1 vs. 3)
	4	w; R65D05-DBD; R52A01-AD/UAS-STOP-Shibirets		8			ns	0.7313 (1 vs. 4)
	5	w; R65D05-DBD/otd-nls::FLPo; R52A01-AD/UAS-STOP-Shibirets	4h hungry	8	0.6241	Dunnett’s
	6	w; R65D05-DBD/otd-nls::FLPo; UAS-STOP-Shibirets	dry sucrose	8			*	0.0250 (5 vs. 6)
	7	w; otd-nls::FLPo; R52A01-AD/UAS-STOP-Shibirets	16-20 min, 32°C	8			**	0.0035 (5 vs. 7)
	8	w; R65D05-DBD; R52A01-AD/UAS-STOP-Shibirets		8			***	0.0006 (5 vs. 8)
	9	w; R65D05-DBD/otd-nls::FLPo; R52A01-AD		8			****	<0.0001 (5 vs. 9)
Figure 3I	1	w; R65D05-DBD/UAS-VGAT.IR(GD); R52A01-AD	8h thirsty	9	Kruskal-Wallis	Dunn’s
	2	w; UAS-VGAT.IR(GD); R52A01-AD	grid	7			*	0.0465 (1 vs. 2)
	3	w; R65D05-DBD/UAS-VGAT.IR(GD)	7-10 min	8			*	0.0316 (1 vs. 3)
Figure 3J	1	w; R65D05-DBD; R52A01-AD/UAS-Gad1.IR	16h thirsty	8	0.7644	Tukey’s
	2	w; R52A01-AD/UAS-Gad1.IR	grid	8			****	<0.0001 (1 vs. 2)
	3	w; R65D05-DBD; UAS-Gad1.IR	13-16 min	8			****	<0.0001 (1 vs. 3)
	4	w; R65D05-DBD; R52A01-AD/UAS-Gad1.IR	16h thirsty	8	0.1709	Tukey’s
	5	w; R65D05-DBD; R52A01-AD	open	9			*	0.0287 (4 vs. 5)
	6	w; UAS-Gad1.IR	16-20 min	11			**	0.0017 (4 vs. 6)
Figure 3K	1	w; R65D05-Gal4,UAS-TrpA1/++	H2O replete	6	0.2321	Dunnett’s
	2	w; R65D05-Gal4,UAS-TrpA1,UAS-Gad1.IR/+++	grid	6			*	0.0125 (1 vs. 2)
	3	w; R65D05-Gal4/+	13-16 min	6			**	0.0056 (1 vs. 3)
	4	w; UAS-TrpA1,UAS-Gad1.IR/++		6			***	0.0006 (1 vs. 4)
Figure 3L	1	w; R65D05-DBD; R52A01-AD/UAS-Gad1.IR	16h thirsty	68	0.2959	Tukey's
	2	w; R65D05-DBD; R52A01-AD	PER consumption, s	61			ns	0.6214 (1 vs. 2)
	3	w; UAS-Gad1.IR		44			ns	0.0594 (1 vs. 3)
Figure 3M	1	w; R65D05-DBD; R52A01-AD/UAS-Gad1.IR	16h thirsty	80	Kruskal-Wallis	Dunn's
	2	w; R65D05-DBD; R52A01-AD	PER consumption first bout length, s	74			ns	<0.0001 (1 vs. 2)
	3	w; UAS-Gad1.IR		68			ns	<0.0001 (1 vs. 3)
Figure 3N	1	w; R65D05-DBD; R52A01-AD/UAS-Gad1.IR	Fed	10	0.5267	Tukey’s
	2	w; R65D05-DBD; R52A01-AD	dry sucrose	9			ns	0.9951 (1 vs. 2)
	3	w; UAS-Gad1.IR	13-16 min	11			ns	0.4661 (1 vs. 3)
	4	w; R65D05-DBD; R52A01-AD/UAS-Gad1.IR	16h hungry	8	0.9301	Tukey’s
	5	w; R52A01-AD/UAS-Gad1.IR	dry sucrose	8			ns	0.1059 (4 vs. 5)
	6	w; R65D05-DBD; UAS-Gad1.IR	13-16 min	8			ns	0.2948 (4 vs. 6)
Figure 3-figure supplement 1A	1	w; R65D05-DBD/UAS-VGAT.IR(KK); R52A01-AD	16h thirsty	8	0.19	Tukey’s
	2	w; UAS-VGAT.IR(KK); R52A01-AD	grid	7			**	0.0053 (1 vs. 2)
	3	w; R65D05-DBD/UAS-VGAT.IR(KK)	13-16 min	9			**	0.0062 (1 vs. 3)
Figure 3-figure supplement 1B	1	w; R65D05-DBD; R52A01-AD/UAS-Gad1.IR	16h thirsty	26	0.0564	Tukey's
	2	w; R65D05-DBD; R52A01-AD	pumping frequency	24			ns	0.3396 (1 vs. 2)
	3	w; UAS-Gad1.IR		22			ns	0.9223 (1 vs. 3)
Figure 3-figure supplement 1C	1	w; R65D05-DBD; R52A01-AD/UAS-Gad1.IR	16h thirsty	28	Kruskal-Wallis	Dunn's
	2	w; R65D05-DBD; R52A01-AD	open field intake	25			ns	0.3198 (1 vs. 2)
	3	w; UAS-Gad1.IR		31			***	0.0008 (1 vs. 3)
Figure 4H	1	w; R65D05-DBD/UAS-Dcr2; R52A01-AD/UAS-AstA.IR(KK)	8h thirsty	7	0.066	Tukey’s
	2	w; UAS-Dcr2; R52A01-AD/UAS-AstA.IR(KK)	grid	7			****	<0.0001 (1 vs. 2)
	3	w; R65D05-DBD/UAS-Dcr2; UAS-AstA.IR(KK)	13-16 min	6			****	<0.0001 (1 vs. 3)
	4	w; R65D05-DBD/UAS-Dcr2; R52A01-AD		8			****	<0.0001 (1 vs. 4)
Figure 4I	1	w; R65D05-DBD/UAS-Dcr2; R52A01-AD/UAS-AstA.IR(KK)	12h thirsty	12	0.0737	Tukey’s
	2	w; UAS-Dcr2; R52A01-AD/UAS-AstA.IR(KK)	open	12			*	0.0144 (1 vs. 2)
	3	w; R65D05-DBD/UAS-Dcr2; UAS-AstA.IR(KK)	13-16 min	12			*	0.0208 (1 vs. 3)
	4	w; R65D05-DBD/UAS-Dcr2; R52A01-AD		8			**	0.0029 (1 vs. 4)
Figure 4J	1	w	16h thirsty	13	0.7512	Tukey's
	2	w;; AstA(sk1)/AstA(sk1)	grid	13			**	0.0023 (1 vs. 2)
	3	w;; AstA(sk1)/Df(3R)BSC519		10			****	<0.0001 (1 vs. 3)
Figure 4K	3	w;; AstA(sk1)/AstA(sk1)	16h thirsty	4	0.7878	t test	*	0.0106
	4	w	open, 13-16 min	8
	5	w;; AstA(sk1)/AstA(sk1)	H2O replete	8	0.6684	t test	ns	0.3472
	6	w	open, 13-16 min	8
Figure 4L	1	w; R65D05-DBD; R52A01-AD,UAS-TrpA1	H2O replete	15	0.134	Tukey's
	2	w; R65D05-DBD/UAS-Dcr2; R52A01-AD,UAS-TrpA1/UAS-AstA.IR(KK)	open	11			***	0.0003 (1 vs. 2)
	3	w; R65D05-DBD; R52A01-AD		12			*	0.0166 (1 vs. 3)
Figure 4M	1	w; R65D05-DBD/UAS-Dcr2; R52A01-AD/UAS-AstA.IR(KK)	16h thirsty	52	0.0919	Tukey's
	2	w; R65D05-DBD; R52A01-AD	PER consumption, s	41			ns	0.2089 (1 vs. 2)
	3	w; UAS-Dcr2; UAS-AstA.IR(KK)		33			ns	0.0940 (1 vs. 3)
Figure 4N	1	w; R65D05-DBD/UAS-Dcr2; R52A01-AD/UAS-AstA.IR(KK)	16h thirsty	52	Kruskal-Wallis	Dunn's
	2	w; R65D05-DBD; R52A01-AD	PER consumption first bout length, s	42			ns	0.0586 (1 vs. 2)
	3	w; UAS-Dcr2; UAS-AstA.IR(KK)		37			ns	0.3299 (1 vs. 3)
Figure 4O	1	w; R65D05-DBD/UAS-Dcr2; R52A01-AD/UAS-AstA.IR(KK)	fed	10	0.3907	Tukey’s
	2	w; R65D05-DBD/UAS-Dcr2; UAS-AstA.IR(KK)	dry sucrose	7			**	0.0047 (1 vs. 2)
	3	w; UAS-Dcr2; R52A01-AD/UAS-AstA.IR(KK)	13-16 min	8			****	<0.0001 (1 vs. 3)
	4	w; R65D05-DBD/UAS-Dcr2; R52A01-AD/UAS-AstA.IR(KK)	8h hungry	8	0.2179	Tukey's
	5	w; R65D05-DBD/UAS-Dcr2; UAS-AstA.IR(KK)	dry sucrose	8			**	0.0016 (4 vs. 5)
	6	w; UAS-Dcr2; R52A01-AD/UAS-AstA.IR(KK)	13-16 min	8			***	0.0002 (4 vs. 6)
Figure 4-figure supplement 1C	1	w; R65D05-DBD/UAS-Dcr2; R52A01-AD/UAS-AstA.IR(GD)	8h thirsty	12	0.0751	Tukey’s
	2	w; UAS-Dcr2; R52A01-AD/UAS-AstA.IR(GD)	grid	7			***	0.0002 (1 vs. 2)
	3	w; R65D05-DBD/UAS-Dcr2; UAS-AstA.IR(GD)	7-10 min	7			*	0.0437 (1 vs. 3)
Figure 4-figure supplement 1D	1	w; Durstig-Gal4/UAS-Dcr2; UAS-AstA.IR(KK)	16h thirsty	8	0.9266	Tukey’s
	2	w; Durstig-Gal4/UAS-Dcr2	grid	12			***	0.0002 (1 vs. 2)
	3	w; UAS-AstA.IR(KK)	7-10 min	8			**	0.0077 (1 vs. 3)
Figure 4-figure supplement 1E	1	w; UAS-Dcr2; R65D05-Gal4/UAS-AstA.IR(sh)	16h thirsty	8	0.2135	Tukey’s
	2	w; UAS-Dcr2; R65D05-Gal4	open	8			****	<0.0001 (1 vs. 2)
	3	w; UAS-Dcr2; UAS-AstA.IR(sh)	7-10 min	6			****	<0.0001 (1 vs. 3)
Figure 4-figure supplement 1F	1	w; R65D05-Gal4/UAS-TrpA1	replete	8	0.5329	Tukey’s
	2	w; UAS-Dcr2; R65D05-Gal4/UAS-AstA.IR(KK),UAS-TrpA1	open water	8			***	0.0010 (1 vs. 2)
	3	w; R65D05-Gal4	7-10 min	8			****	<0.0001 (1 vs. 3)
	4	w; UAS-Dcr2; UAS-AstA.IR(kk),UAS-TrpA1		8			****	<0.0001 (1 vs. 4)
Figure 4-figure supplement 1G	1	w; R65D05-DBD/UAS-Dcr2; R52A01-AD/UAS-AstA.IR(KK)	18h thirsty	65	Kruskal-Wallis	Dunn's
	2	w; R65D05-DBD; R52A01-AD	pumping frequency	64			ns	>0.9999 (1 vs. 2)
	3	w; UAS-Dcr2; UAS-AstA.IR(KK)		64			***	0.0003 (1 vs. 3)
Figure 4-figure supplement 1H	1	w; R65D05-DBD/UAS-Dcr2; R52A01-AD/UAS-AstA.IR(KK)	16h thirsty	16	0.6541	Tukey’s
	2	w; R65D05-DBD/UAS-Dcr2; UAS-AstA.IR(KK)	intake	20			ns	0.8009 (1 vs. 2)
	3	w; UAS-Dcr2; R52A01-AD/UAS-AstA.IR(KK)	16 min	20			ns	0.3069 (1 vs. 3)
Figure 4-figure supplement 1I	1	w;; AstA(sk1)/AstA(sk1)	16h thirsty	8	(F test) 0.1813	t test	ns	0.5555
	2	w;; +/+	intake, 16 min	8
Figure 4-figure supplement 1J	1	w; R65D05-DBD/UAS-Dcr2; R52A01-AD/UAS-AstA.IR(sh)	16h hungry	8	0.7998	Tukey’s
	2	w; UAS-Dcr2; R52A01-AD/UAS-AstA.IR(sh)	dry sucrose	8			***	0.0004 (1 vs. 2)
	3	w; R65D05-DBD/UAS-Dcr2; UAS-AstA.IR(sh)	13-16 min	8			***	0.0001 (1 vs. 3)
	4	w; R65D05-DBD/UAS-Dcr2; R52A01-AD		8			**	0.0079 (1 vs. 4)
Figure 5B	1	Janu-GABA1 replete	replete	18	Benjamini, Krieger, & Yekutieli FDR @ 1%	t test
	2	Janu-GABA1 thirsty	20h thirsty	22			**	0.0016 (1 vs. 2)
	3	Janu-GABA2 replete	replete	17
	4	Janu-GABA2 thirsty	20h thirsty	22			ns	0.0135 (3 vs. 4)
	5	Janu-AstA replete	replete	13
	6	Janu-AstA thirsty	20h thirsty	10			ns	0.0949 (5 vs. 6)
	7	Janu-Contra replete	replete	16
	8	Janu-Contra thirsty	20h thirsty	16			ns	0.4193 (7 vs. 8)
Figure 5C	1	Janu-GABA1 satiated	satiated	19	Benjamini, Krieger, & Yekutieli FDR @ 1%	t test
	2	Janu-GABA1 hungry	24h hungry	16			ns	0.7156 (1 vs. 2)
	3	Janu-GABA2 satiated	satiated	15
	4	Janu-GABA2 hungry	24h hungry	10			ns	0.8046 (3 vs. 4)
	5	Janu-AstA satiated	satiated	16
	6	Janu-AstA hungry	24h hungry	12			ns	0.7234 (5 vs. 6)
	7	Janu-Contra satiated	satiated	4
	8	Janu-Contra hungry	24h hungry	7			ns	0.1215 (7 vs. 8)
Figure 5E	1	w; R65D05-DBD; R52A01-AD/UAS-Chrimson +ATR	H2O replete	10	0.7159	Tukey’s
	2	w; R65D05-DBD; R52A01-AD/UAS-Chrimson -ATR		10			**	0.0017 (1 vs. 2)
	3	w; R65D05-DBD; R52A01-AD +ATR		9			**	0.0012 (1 vs. 3)
Figure 5-figure supplement 1C	1	w;; R65D05-Gal4/UAS-Chrimson +ATR	H2O replete	9	(F test) 0.1083	t test	**	0.0056
	2	w;; R65D05-Gal4/UAS-Chrimson -ATR		5
Figure 6D	1	w; NPF-Gal4; UAS-AstA-R2.IR	16h thirsty	16	0.134	Tukey's
	2	w; NPF-Gal4	grid	8			***	0.0003 (1 vs. 2)
	3	w;; UAS-AstA-R2.IR	7-10 min	8			***	0.0003 (1 vs. 3)
	4	w; NPF-Gal4; UAS-AstA-R2.IR	16h thirsty	7	0.7588	Tukey's
	5	w; NPF-Gal4	open	8			*	0.0415 (4 vs. 5)
	6	w;; UAS-AstA-R2.IR	7-10 min	8			*	0.0316 (4 vs. 6)
	7	w; NPF-Gal4; UAS-AstA-R2.IR	16h hungry	8	0.2129	Tukey's
	8	w; NPF-Gal4	dry sucrose	8			*	0.0264 (7 vs. 8)
	9	w;; UAS-AstA-R2.IR	7-10 min	8			**	0.0038 (7 vs. 9)
	10	w; NPF-Gal4; UAS-AstA-R2.IR	fed	12	0.3842	Tukey's
	11	w; NPF-Gal4	dry sucrose	6			**	0.0070 (10 vs. 11)
	12	w;; UAS-AstA-R2.IR	13-16 min	6			*	0.0325 (10 vs. 12)
Figure 6E	1	w; NPF-Gal4; UAS-AstA-R2.IR	16h thirsty	55	Kruskal-Wallis	Dunn's
	2	w; NPF-Gal4	PER consumption, s	65			*	0.0366 (1 vs. 2)
	3	w;; UAS-AstA-R2.IR		68			****	<0.0001 (1 vs. 3)
Figure 6F	1	w; NPF-Gal4; UAS-AstA-R2.IR	16h thirsty	55	Kruskal-Wallis	Dunn's
	2	w; NPF-Gal4	PER consumption first bout length, s	65			**	0.0020 (1 vs. 2)
	3	w;; UAS-AstA-R2.IR		68			**	0.0088 (1 vs. 3)
Figure 6G	1	w;;+/+	4h thirsty	8	Mann-Whitney		*	0.0182 (1 vs. 2)
	2	w;;NPF(sk2)/NPF(sk2)	Grid	8
	3	w;;+/+	4h thirsty	10	Mann-Whitney		***	0.0002 (3 vs. 4)
	4	w;;NPF(sk2)/Df(3R)BSC472	Grid	10
Figure 6H	1	w; NPF-Gal4/UAS-NPF.IR sh	8h thirsty	8	0.0843	Tukey’s
	2	w; NPF-Gal4	Grid	10			**	0.0095 (1 vs. 2)
	3	w; UAS-NPF.IR sh	13-16 min	5			*	0.0145 (1 vs. 3)
Figure 6I	1	NPF P1 replete	replete	32	(F test) 0.1995		****	<0.0001 (1 vs. 2)
	2	NPF P1 thirsty	20h thirsty	28
	3	NPF L1-l replete	replete	32	(F test) 0.7123		*	0.0301 (3 vs. 4)
	4	NPF L1-l thirsty	20h thirsty	27
Figure 6-figure supplement 1A	1	w; NPF-Gal4; UAS-AstA-R1.IR	16h thirsty	8	0.2927	Tukey's
	2	w; NPF-Gal4	grid	8			ns	0.5169 (1 vs. 2)
	3	w;; UAS-AstA-R1.IR	13-16 min	8			ns	0.8164 (1 vs. 3)
	4	w; NPF-Gal4; UAS-AstA-R1.IR	16h thirsty	8	0.0706	Tukey's
	5	w; NPF-Gal4	open	8			ns	0.2925 (4 vs. 5)
	6	w;; UAS-AstA-R1.IR	4-7 min	12			ns	0.9492 (4 vs. 6)
	7	w; NPF-Gal4; UAS-AstA-R1.IR	16h hungry	8	0.4054	Tukey's
	8	w; NPF-Gal4	dry sucrose	8			ns	0.4967 (7 vs. 8)
	9	w;; UAS-AstA-R1.IR	7-10 min	8			ns	0.7647 (7 vs. 9)
Figure 6-figure supplement 1B	1	w; NPF-Gal4; UAS-AstA-R2.IR	16h thirsty	27	0.1302	Tukey’s
	2	w; NPF-Gal4	pumping frequency	35			ns	0.2314 (1 vs. 2)
	3	w;; UAS-AstA-R2.IR		30			*	0.0299 (1 vs. 3)
